# Supplementary material for: Polymerization of polyhedral oligomeric silsequioxane (POSS) with perfluoro-monomers and a kinetic study
Source: Royal Society of Chemistry journal article supplement (doi:10.1039/c6ra26183c), 2017-01-01
Supplement: c6ra26183c1.pdf [file c6ra26183c1.pdf]

Supporting information

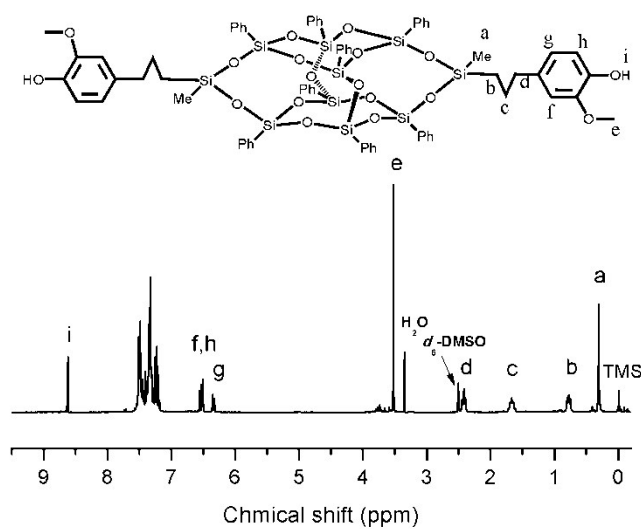

<sup>1</sup>H NMR spectrum of 3,13-di(2-methoxy-4-propylphenol) octaphenyl DDSQ (2OH-DDSQ)

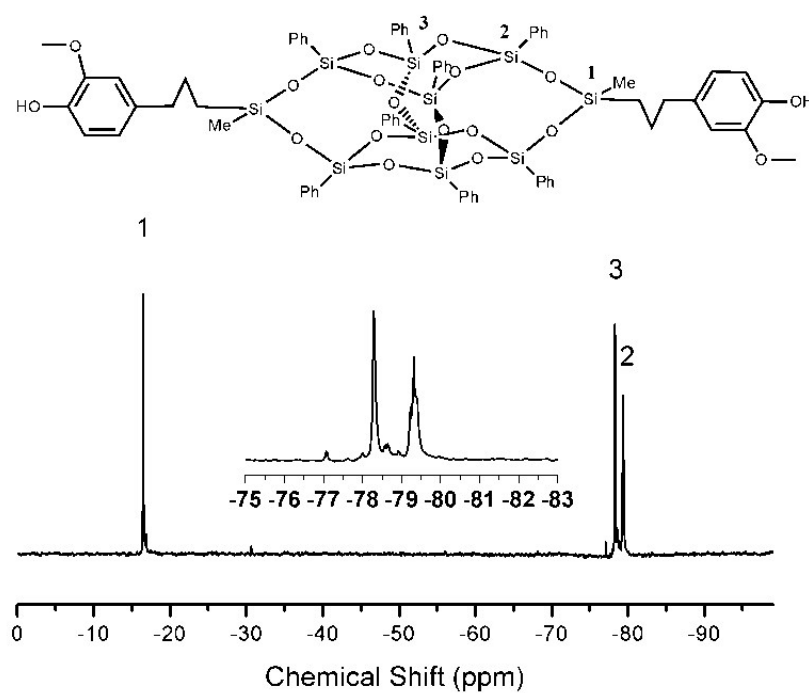

<sup>29</sup>Si NMR spectrum of 3,13-di(2-methoxy-4-propylphenol) octaphenyl DDSQ (2OH-DDSQ)

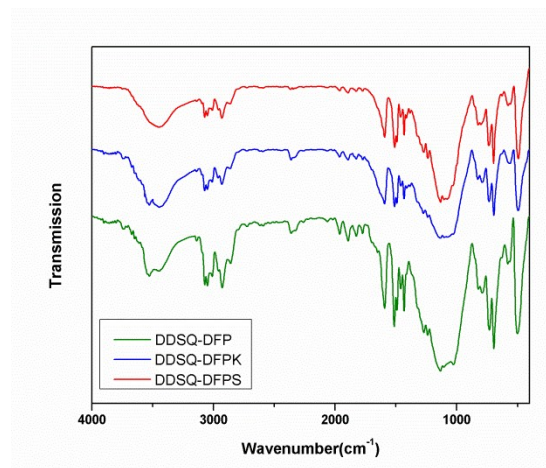

FT-IR spectra of DDSQ-DFPXs
